# Supplementary material for: Syntactic- and morphology-based text augmentation framework for Arabic sentiment analysis
Source: PeerJ journal article supplement (doi:10.7717/peerj-cs.469), 2021-04-05
Supplement: Supplemental_File.pdf [file Supplemental_File.pdf]

Raw Data

This code is shared using FigShare with the following URL and DOI

<https://figshare.com/s/2fd1b7f1a6c91f659a3c>

DOI:

10.6084/m9.figshare.14074268
